# Supplementary material
Source: ML conference proceedings conference paper supplement (https://proceedings.mlr.press/v119/deng20a.html)
Supplement: Supplementary file 1 [file deng20a-supp.pdf]

# Supplementary Material

## A Omitted Proofs

### A.1 Proof of Theorem 4.1

In order to prove Theorem 4.1, let us first state the Danskin theorem.

**Lemma A.1** (Danskin). *Let  $\mathcal{B}$  be nonempty compact topological space and  $h : \mathbb{R}^d \times \mathcal{B} \rightarrow \mathbb{R}$  be such that  $h(\cdot, \delta)$  is differentiable for every  $\delta \in \mathcal{B}$  and  $\nabla_{\theta} h(\theta, \delta)$  is continuous on  $\mathbb{R}^d \times \mathcal{B}$ . Also, let  $\delta^*(\theta) = \{\delta \in \arg \max_{\delta \in \mathcal{B}} h(\theta, \delta)\}$ .*

*Then, the corresponding max-function*

$$\zeta(\theta) = \max_{\delta \in \mathcal{B}} h(\theta, \delta)$$

*is locally Lipschitz continuous, directionally differentiable, and its directional derivatives satisfy*

$$\zeta'(\theta, r) = \sup_{\delta \in \delta^*(\theta)} r^T \nabla_{\theta} h(\theta, \delta).$$

*In particular, if for some  $\theta \in \mathbb{R}^d$  the set  $\delta^*(\theta) = \{\delta_{\theta}^*\}$  is a singleton, the max-function is differentiable at  $\theta$  and*

$$\nabla \zeta(\theta) = \nabla_{\theta} h(\theta, \delta_{\theta}^*).$$

By this lemma, we can easily obtain the following lemma:

**Lemma A.2.** *For any  $\tilde{\theta}$  that minimize  $\zeta(\theta)$  and lying in the interior, we can obtain*

$$\nabla_{\theta} h(\tilde{\theta}, \delta) = 0.$$

*Proof.* Since  $\tilde{\theta}$  minimizes  $\zeta(\theta)$  and lies in the interior of  $\Theta$ , we can obtain

$$\zeta'(\tilde{\theta}, r) = 0$$

for any direction vector  $r$ .

If there is a  $\delta \in \delta^*(\tilde{\theta})$ , such that  $\nabla_{\theta} h(\tilde{\theta}, \delta) \neq 0$ , then we take  $r = \nabla_{\theta} h(\tilde{\theta}, \delta) / \|\nabla_{\theta} h(\tilde{\theta}, \delta)\|$ , we have

$$\zeta'(\tilde{\theta}, r) = \sup_{\delta \in \delta^*(\tilde{\theta})} r^T \nabla_{\theta} h(\tilde{\theta}, \delta) \geq \|\nabla_{\theta} h(\tilde{\theta}, \delta)\|_2 > 0,$$

which is contradictory to the fact  $\zeta'(\tilde{\theta}, r) = 0$ . □

**[Proof of Theorem 1]** Now we are ready to give the formal proof. In order for simplicity, we here use  $L(\theta^{\mathcal{M}}, x, y)$  instead of  $L(\theta^{\mathcal{M}}, x, y, \mathcal{M})$ . With lemma A.2, we can obtain that

$$\frac{1}{n} \sum_{i=1}^n \nabla_{\theta} L(\theta^{\mathcal{M}}, x_i + \delta_i, y_i) |_{\theta^{\mathcal{M}} = \hat{\theta}_{\varepsilon, \min}^{\mathcal{M}}} = 0.$$

With Taylor expansion and under the assumption of Lemma A.2, we can obtain

$$0 = \frac{1}{n} \sum_{i=1}^n [\nabla_{\theta} L(\hat{\theta}_{\varepsilon, \min}^{\mathcal{M}}, x_i, y_i) + \nabla_{x, \theta} L(\hat{\theta}_{\varepsilon, \min}^{\mathcal{M}}, x_i, y_i) \delta_i + O(\|\delta\|_2^2)].$$

Here the assumption of compactness and continuity can help us to write the remainder  $\frac{1}{2}\delta_i^T H_{\hat{\theta}} \delta_i$  into  $O(\|\delta_i\|_2^2)$  since we can bound every entry of  $H_{\hat{\theta}}$ . We use the same property repeatedly and will not reiterate it.

Now, let us perform taylor expansion on  $\nabla_{\theta} L(\hat{\theta}_{\varepsilon, \min}^{\mathcal{M}}, x_i, y_i)$  and  $\nabla_{x, \theta} L(\hat{\theta}_{\varepsilon, \min}^{\mathcal{M}}, x_i, y_i)$ .

$$\nabla_{\theta} L(\hat{\theta}_{\varepsilon, \min}^{\mathcal{M}}, x_i, y_i) = \nabla_{\theta} L(\hat{\theta}_{\min}^{\mathcal{M}}, x_i, y_i) + \nabla_{\theta}^2 L(\hat{\theta}_{\min}^{\mathcal{M}}, x_i, y_i)(\hat{\theta}_{\varepsilon, \min}^{\mathcal{M}} - \hat{\theta}_{\min}^{\mathcal{M}}) + O(\|\hat{\theta}_{\varepsilon, \min}^{\mathcal{M}} - \hat{\theta}_{\min}^{\mathcal{M}}\|_2^2)$$

and

$$\nabla_{x, \theta} L(\hat{\theta}_{\varepsilon, \min}^{\mathcal{M}}, x_i, y_i) = \nabla_{x, \theta} L(\hat{\theta}_{\min}^{\mathcal{M}}, x_i, y_i) + O(\|\hat{\theta}_{\varepsilon, \min}^{\mathcal{M}} - \hat{\theta}_{\min}^{\mathcal{M}}\|_2).$$

By simple algebra,

$$\begin{aligned} \hat{\theta}_{\varepsilon, \min}^{\mathcal{M}} - \hat{\theta}_{\min}^{\mathcal{M}} + O(\|\hat{\theta}_{\varepsilon, \min}^{\mathcal{M}} - \hat{\theta}_{\min}^{\mathcal{M}}\|_2^2) &= \left(-\frac{1}{n} \sum_{i=1}^n \nabla_{\theta}^2 L(\hat{\theta}_{\min}^{\mathcal{M}}, x_i, y_i)\right)^{-1} \left(\frac{1}{n} \sum_{i=1}^n \nabla_{x, \theta} L(\hat{\theta}_{\min}^{\mathcal{M}}, x_i, y_i) \delta_i \right. \\ &\quad \left. + \|\hat{\theta}_{\varepsilon, \min}^{\mathcal{M}} - \hat{\theta}_{\min}^{\mathcal{M}}\|_2 \|\delta_i\|_2\right). \end{aligned}$$

We know if we divided  $\varepsilon$  on both sides, we know when  $\varepsilon$  goes to 0, the limit of the right handside exists if we assume the limit of  $\lim_{\varepsilon \rightarrow 0} \delta_i/\varepsilon$  exist (notice  $\delta_i$  is a implicit function of  $\varepsilon$ ). Thus,  $\|\hat{\theta}_{\varepsilon, \min}^{\mathcal{M}} - \hat{\theta}_{\min}^{\mathcal{M}}\|/\varepsilon$  cannot goes to infinity as  $\varepsilon$  goes to 0. In other words, AIF must exist.

Now the only thing left is to prove  $\lim_{\varepsilon \rightarrow 0} \delta_i/\varepsilon$  exist. We prove that

$$\lim_{\varepsilon \rightarrow 0} \frac{\delta_i}{\varepsilon} = \gamma_i,$$

where

$$\gamma_{i,k} = \frac{b_k^{q-1}}{(\sum_{k=1}^m b_k^q)^{\frac{1}{p}}} \operatorname{sgn}\left(\frac{\partial}{\partial x_{\cdot, k}} L(\hat{\theta}_{\min}^{\mathcal{M}}, x_i, y_i)\right),$$

with  $b_k = \left|\frac{\partial}{\partial x_{\cdot, k}} L(\hat{\theta}_{\min}^{\mathcal{M}}, x_i, y_i)\right|$ . By Hölder inequality, we know

$$|\nabla_x L(\hat{\theta}_{\min}^{\mathcal{M}}, x_i, y_i) \cdot \delta_i| \leq \varepsilon \|\nabla_x L(\hat{\theta}_{\min}^{\mathcal{M}}, x_i, y_i)\|_q$$

the equality holds if and only if  $\delta_i = \varepsilon \gamma_i$ . Since

$$L(\hat{\theta}_{\varepsilon, \min}^{\mathcal{M}}, x_i + \delta_i, y_i) = L(\hat{\theta}_{\varepsilon, \min}^{\mathcal{M}}, x_i, y_i) + \nabla_x L(\hat{\theta}_{\varepsilon, \min}^{\mathcal{M}}, x_i, y_i) \delta_i + O(\|\delta_i\|_2^2),$$

we know the reminder is ignorable

$$\frac{O(\|\delta_i\|_2^2)}{|L(\hat{\theta}_{\varepsilon, \min}^{\mathcal{M}}, x_i, y_i) \delta_i|} \rightarrow 0$$

as  $\varepsilon$  goes to 0. So, we must have

$$\lim_{\varepsilon \rightarrow 0} \frac{\delta_i}{\varepsilon} = \gamma_i.$$

As a result,

$$\hat{\mathcal{I}}(\mathcal{M}) = -H_{\hat{\theta}_{\min}^{\mathcal{M}}}^{-1} \Phi$$

as described in the theorem.

## A.2 Proof of Theorem 5.1

Let us first compute the AIF for linear models.

Specifically, let us consider the regression setting  $(x_i, y_i) \in \mathbb{R}^d \times \mathbb{R}$  are *i.i.d.* draws from a joint distribution  $P_{x,y}$ , for  $i = 1, 2, \dots, n$ . Note that we don't assume linear relationship, but the linear regression model tries to find the best linear approximation by solving

$$\hat{\theta} = \arg \min_{\theta} \frac{1}{n} \sum_{i=1}^n l(\theta, x_i, y_i) := \arg \min_{\theta} \frac{1}{2n} \sum_{i=1}^n (y_i - \theta^T x_i)^2,$$

where we use  $l(\theta, x_i, y_i) = \frac{1}{2}(y_i - \theta^T x_i)^2$  as the loss function.

Further, let us define

$$\theta^* = \arg \min_{\theta} \mathbb{E}_{P_{x,y}} \left[ \frac{1}{2} (Y - \theta^T X)^2 \right],$$

denoting the best population linear approximation to  $Y$ .

When the true model is  $Y = X^T \beta_1^* + (X^T \beta_2^*)^2 + \xi$ , and  $X \sim \mathcal{N}(0, \sigma_x^2 I)$ , we have

$$\theta^* = (\mathbb{E}[X X^T])^{-1} \mathbb{E}[X Y] = (\mathbb{E}[X X^T])^{-1} (\mathbb{E}[X X^T \beta_1^*] + \mathbb{E}[X (X^T \beta_2^*)^2]) = \beta_1^*.$$

Further, denote  $\epsilon_i = y_i - \theta^{*\top} x_i$ , and

$$\hat{\theta} = \arg \min_{\theta} \frac{1}{2n} \sum_{i=1}^n (y_i - \theta^T x_i)^2,$$

and we have  $\|\hat{\theta} - \theta^*\|_2 = O_p(\sqrt{\frac{m}{n}})$ .

By definition, for  $k \in [m]$ ,

$$b_k = \left| \frac{\partial}{\partial x_{.,k}} l(\hat{\theta}_{\min}^{\mathcal{M}}, x_i, y_i, \mathcal{M}) \right| = |y_i - \hat{\theta}^{\top} x_i| \cdot |\hat{\theta}_k|,$$

and therefore, by letting  $p = q = 2$ , in Eqn (5) of Theorem 4.1,

$$\begin{aligned} \psi_k^i &= \frac{b_k^{q-1}}{(\sum_{k=1}^d b_k^q)^{\frac{1}{p}}} \operatorname{sgn} \left( \frac{\partial}{\partial x_{.,k}} l(\hat{\theta}_{\min}^{\mathcal{M}}, x_i, y_i, \mathcal{M}) \right) = \frac{b_k}{(\sum_{k=1}^d b_k^2)^{1/2}} \operatorname{sgn}((y_i - \hat{\theta}^{\top} x_i) \cdot \hat{\theta}_k) \\ &= \frac{(y_i - \hat{\theta}^{\top} x_i) \cdot \hat{\theta}_k}{|y_i - \hat{\theta}^{\top} x_i| \cdot \|\hat{\theta}\|_2} = \frac{\hat{\theta}_k}{\|\hat{\theta}\|} \cdot \operatorname{sgn}(y_i - \hat{\theta}^{\top} x_i). \end{aligned}$$

As a result

$$\phi_i = (\psi_1^i, \psi_2^i, \dots, \psi_m^i)^T = \operatorname{sgn}(y_i - \hat{\theta}^{\top} x_i) \cdot \frac{1}{\|\hat{\theta}\|} \cdot \hat{\theta},$$

and

$$\begin{aligned}
\frac{\Phi}{\mathbb{E}_{x \sim \hat{P}_x} \|x\|_2} &= \frac{1}{n} \sum_{i=1}^n \nabla_{x, \theta} l(\hat{\theta}_{\min}^{\mathcal{M}}, x_i, y_i, \mathcal{M}) \phi_i = \frac{1}{n} \sum_{i=1}^n [(\hat{\theta}^\top x_i - y_i) \cdot I_d + \hat{\theta} x_i^\top] \cdot \text{sgn}(y_i - \hat{\theta}^\top x_i) \cdot \frac{1}{\|\hat{\theta}\|} \cdot \hat{\theta} \\
&= \frac{1}{n \|\hat{\theta}\|} \sum_{i=1}^n [(\hat{\theta}^\top x_i - y_i) \cdot \hat{\theta} + \hat{\theta} x_i^\top \hat{\theta}] \cdot \text{sgn}(y_i - \hat{\theta}^\top x_i) \\
&= -\frac{1}{n \|\hat{\theta}\|} \sum_{i=1}^n (y_i \cdot \hat{\theta}) \cdot \text{sgn}(y_i - \hat{\theta}^\top x_i) \\
&= -\frac{\hat{\theta}}{n \|\hat{\theta}\|} \sum_{i=1}^n y_i \cdot \text{sgn}(y_i - \hat{\theta}^\top x_i) \\
&= -\frac{\hat{\theta}}{n \|\hat{\theta}\|} \sum_{i=1}^n (\epsilon_i + \theta^{*\top} x_i) \cdot \text{sgn}(y_i - \hat{\theta}^\top x_i) \\
&= -\frac{\hat{\theta}}{n \|\hat{\theta}\|} \sum_{i=1}^n \theta^{*\top} x_i \cdot \text{sgn}(y_i - \hat{\theta}^\top x_i) - \frac{\hat{\theta}}{n \|\hat{\theta}\|} \sum_{i=1}^n \epsilon_i \cdot \text{sgn}(y_i - \hat{\theta}^\top x_i) \\
&= -\frac{\hat{\theta}}{n \|\hat{\theta}\|} \sum_{i=1}^n \theta^{*\top} x_i \cdot \text{sgn}(\epsilon_i) - \frac{\hat{\theta}}{n \|\hat{\theta}\|} \sum_{i=1}^n \epsilon_i \cdot \text{sgn}(\epsilon_i) \\
&\quad + \frac{\hat{\theta}}{n \|\hat{\theta}\|} \sum_{i=1}^n \theta^{*\top} x_i \cdot (\text{sgn}(\epsilon_i) - \text{sgn}(\epsilon_i - (\hat{\theta} - \theta^*)^\top x_i)) \\
&\quad + \frac{\hat{\theta}}{n \|\hat{\theta}\|} \sum_{i=1}^n \epsilon_i \cdot (\text{sgn}(\epsilon_i) - \text{sgn}(\epsilon_i - (\hat{\theta} - \theta^*)^\top x_i)).
\end{aligned}$$

$$\mathbb{P}(\text{sgn}(\epsilon_i) \neq \text{sgn}(\epsilon_i - (\hat{\theta} - \theta^*)^\top x_i)) \leq \mathbb{P}(|\epsilon_i| \leq |(\hat{\theta} - \theta^*)^\top x_i|) = O\left(\sqrt{\frac{1}{n}}\right) = o(1).$$

Recall that  $\epsilon_i = y_i - \theta^{*\top} x_i = (x_i^\top \beta_2^*)^2 + \xi_i$ , then we obtain  $x_i \text{sgn}((x_i^\top \beta_2^*)^2 + \xi_i) \stackrel{d}{=} -x_i \text{sgn}((x_i^\top \beta_2^*)^2 + \xi_i)$ . As a result, we have  $\mathbb{E}[x_i \text{sgn}(\epsilon_i)] = \mathbb{E}[x_i \text{sgn}((x_i^\top \beta_2^*)^2 + \xi_i)] = 0$ , yielding

$$\frac{1}{n} \sum_{i=1}^n \theta^{*\top} x_i \cdot \text{sgn}(\epsilon_i) = O_p\left(\frac{1}{\sqrt{n}}\right).$$

Then, we have

$$\frac{\Phi}{\mathbb{E}_{x \sim \hat{P}_x} \|x\|_2} = -\frac{\hat{\theta}}{\|\hat{\theta}\|} \left( \frac{1}{n} \sum_{i=1}^n |\epsilon_i| + O_p\left(\frac{1}{\sqrt{n}}\right) \right) = -\frac{\hat{\theta}}{\|\hat{\theta}\|} (\mathbb{E}|\epsilon_i| + O_p\left(\frac{1}{\sqrt{n}}\right))$$

Moreover, the Hessian matrix

$$H_\theta(X^e, Y^e) = 1/n' \sum_{i=1}^{n'} \nabla_{\theta}^2 l(\hat{\theta}_{\min}^{\mathcal{M}}, x_i^e, y_i^e; \mathcal{A}) = \frac{1}{n} X^{e\top} X^e = \sigma_x^2 I + O_p\left(\sqrt{\frac{m}{n}}\right).$$

Then

$$\begin{aligned}\hat{S}_\epsilon(\mathcal{L}) &= \Phi^\top H_\theta^{-1}(X^e, Y^e)\Phi = (\mathbb{E}_{x \sim \hat{P}_x} \|x\|_2)^2 (\mathbb{E}|\epsilon_i| + O_p(\frac{1}{\sqrt{n}}))^2 \frac{\hat{\theta}^\top (\sigma_x^2 I + O_p(\sqrt{\frac{m}{n}}))^{-1} \hat{\theta}}{\|\hat{\theta}\|^2} \\ &= (\mathbb{E}_{x \sim \hat{P}_x} \|x\|_2)^2 \cdot [(\mathbb{E}|\epsilon_i|)^2 + O_p(\frac{1}{\sqrt{n}})] \cdot (\sigma_x^{-2} + O_p(\sqrt{\frac{m}{n}})).\end{aligned}$$

Then, let us consider the quadratic basis of the regression setting  $(x_i, y_i) \in \mathbb{R}^m \times \mathbb{R}$  are *i.i.d.* draws from a joint distribution  $P_{x,y}$ , for  $i = 1, 2, \dots, n$ . Suppose we use the basis  $v(x) = (v_1(x), \dots, v_d(x)) = (x_1, \dots, x_m, x_1^2/2, \dots, x_m^2/2, \{x_j x_k\}_{j < k})$ , to approximate  $y$ , and try to solve

$$\hat{\theta} = \arg \min_{\theta \in \mathbb{R}^m} \frac{1}{n} \sum_{i=1}^n l(\theta, x_i, y_i) := \arg \min_{\theta} \frac{1}{2n} \sum_{i=1}^n (y_i - \theta^\top v(x_i))^2.$$

Further, let us define

$$\theta^* = \arg \min_{\theta} \mathbb{E}_{P_{x,y}} [\frac{1}{2} (Y - \theta^\top v(X))^2],$$

denoting the best population linear approximation to  $Y$ .

Denote  $\epsilon_i = y_i - \theta^{*\top} v(x_i)$ . Since the true model is  $Y = X^\top \beta_1^* + (X^\top \beta_2^*)^2 + \xi$ , and  $X \sim N(0, \sigma_x^2 I)$ , then  $\epsilon_i = \xi_i$  and we have  $\mathbb{E}[\text{sgn}(\epsilon_i)x_i] = 0$ .

Further, denote

$$\hat{\theta} = \arg \min_{\theta} \frac{1}{2n} \sum_{i=1}^n (y_i - \theta^\top v(x_i))^2.$$

We have  $\|\hat{\theta} - \theta^*\| = O_p(\sqrt{\frac{m}{n}})$ .

By definition, for  $k \in [m]$ ,

$$b_k = \left| \frac{\partial}{\partial x_{\cdot,k}} l(\hat{\theta}_{\min}^{\mathcal{M}}, x_i, y_i) \right| = |y_i - \hat{\theta}^\top v(x_i)| \cdot \left| \hat{\theta}^\top \frac{\partial}{\partial x_{\cdot,k}} v(x_i) \right| = |y_i - \hat{\theta}^\top v(x_i)| \cdot \left| \hat{\theta}^\top \frac{\partial}{\partial x} v(x_i) e_k \right|.$$

Therefore, by letting  $p = q = 2$  in Eqn (5) of Theorem 4.1,

$$\begin{aligned}\psi_k^i &= \frac{b_k^{q-1}}{(\sum_{k=1}^d b_k^q)^{\frac{1}{p}}} \text{sgn}\left(\frac{\partial}{\partial x_{\cdot,k}} l(\hat{\theta}_{\min}^{\mathcal{M}}, x_i, y_i)\right) = \frac{b_k}{(\sum_{k=1}^d b_k^2)^{1/2}} \text{sgn}\left(\frac{\partial}{\partial x_{\cdot,k}} l(\hat{\theta}_{\min}^{\mathcal{M}}, x_i, y_i)\right) \\ &= \frac{(\hat{\theta}^\top v(x_i) - y_i) \cdot \hat{\theta}^\top \frac{\partial}{\partial x} v(x_i) e_k}{|y_i - \hat{\theta}^\top v(x_i)| \cdot \|\hat{\theta}^\top \frac{\partial}{\partial x} v(x_i)\|_2} = \frac{\hat{\theta}^\top \frac{\partial}{\partial x} v(x_i) e_k}{\|\hat{\theta}^\top \frac{\partial}{\partial x} v(x_i)\|} \cdot \text{sgn}(\hat{\theta}^\top v(x_i) - y_i).\end{aligned}$$

As a result

$$\phi_i^\top = (\psi_1^i, \psi_2^i, \dots, \psi_m^i) = \text{sgn}(\hat{\theta}^\top v(x_i) - y_i) \cdot \frac{1}{\|\hat{\theta}^\top \frac{\partial}{\partial x} v(x_i)\|} \cdot \hat{\theta}^\top \frac{\partial}{\partial x} v(x_i),$$

and

$$\begin{aligned}\nabla_x l(\hat{\theta}, x_i, y_i) &= (\hat{\theta}^\top v(x_i) - y_i) \cdot \left(\frac{\partial}{\partial x} v(x_i)\right)^\top \hat{\theta} \\ \nabla_{x,\theta} l(\hat{\theta}, x_i, y_i) &= v(x_i) \hat{\theta}^\top \frac{\partial}{\partial x} v(x_i) + (\hat{\theta}^\top v(x_i) - y_i) \cdot \frac{\partial}{\partial x} v(x_i)\end{aligned}$$

Then

$$\begin{aligned}
\frac{\Phi}{\mathbb{E}_{x \sim \hat{P}_x} \|x\|_2} &= \frac{1}{n} \sum_{i=1}^n \nabla_{x, \theta} l(\hat{\theta}_{\min}^{\mathcal{M}}, x_i, y_i) \phi_i \\
&= \frac{1}{n} \sum_{i=1}^n [(\hat{\theta}^\top v(x_i) - y_i) \cdot \frac{\partial}{\partial x} v(x_i) + v(x_i) \hat{\theta}^\top \frac{\partial}{\partial x} v(x_i)] \cdot \text{sgn}(\hat{\theta}^\top v(x_i) - y_i) \\
&\quad \cdot \frac{1}{\|\hat{\theta}^\top \frac{\partial}{\partial x} v(x_i)\|} \cdot \left(\frac{\partial}{\partial x} v(x_i)\right)^\top \hat{\theta} \\
&= \frac{1}{n \|\hat{\theta}^\top \frac{\partial}{\partial x} v(x_i)\|} \sum_{i=1}^n [(\hat{\theta}^\top v(x_i) - y_i) \cdot \frac{\partial}{\partial x} v(x_i) \left(\frac{\partial}{\partial x} v(x_i)\right)^\top \hat{\theta} + v(x_i) \\
&\quad \cdot \|\hat{\theta}^\top \frac{\partial}{\partial x} v(x_i)\|^2] \cdot \text{sgn}(\hat{\theta}^\top v(x_i) - y_i) \\
&= \frac{1}{n \|\hat{\theta}^\top \frac{\partial}{\partial x} v(x_i)\|} \sum_{i=1}^n |\hat{\theta}^\top v(x_i) - y_i| \cdot \frac{\partial}{\partial x} v(x_i) \left(\frac{\partial}{\partial x} v(x_i)\right)^\top \hat{\theta} \\
&\quad + \frac{1}{n} \sum_{i=1}^n v(x_i) \cdot \|\hat{\theta}^\top \frac{\partial}{\partial x} v(x_i)\| \cdot \text{sgn}(\hat{\theta}^\top v(x_i) - y_i) \\
&= \mathbb{E} \left[ \frac{|\hat{\theta}^\top v(x_i) - y_i|}{\|\hat{\theta}^\top \frac{\partial}{\partial x} v(x_i)\|} \frac{\partial}{\partial x} v(x_i) \left(\frac{\partial}{\partial x} v(x_i)\right)^\top \hat{\theta} \right] + O_p \left( \sqrt{\frac{m^2}{n}} \right)
\end{aligned}$$

Then we have

$$\begin{aligned}
&\mathbb{E} \left[ \frac{|\hat{\theta}^\top v(x_i) - y_i|}{\|\hat{\theta}^\top \frac{\partial}{\partial x} v(x_i)\|} \frac{\partial}{\partial x} v(x_i) \left(\frac{\partial}{\partial x} v(x_i)\right)^\top \hat{\theta} \right]^2 \\
&\leq \mathbb{E} \left[ \left\| \frac{|\hat{\theta}^\top v(x_i) - y_i|}{\|\hat{\theta}^\top \frac{\partial}{\partial x} v(x_i)\|} \frac{\partial}{\partial x} v(x_i) \left(\frac{\partial}{\partial x} v(x_i)\right)^\top \hat{\theta} \right\|^2 \right] \\
&\leq \mathbb{E} \left[ \left\| \left(\frac{\partial}{\partial x} v(x_i)\right)^\top \frac{\partial}{\partial x} v(x_i) \right\|_2 \cdot |\hat{\theta}^\top v(x_i) - y_i|^2 \right] \\
&\leq \mathbb{E} \left[ \left\| \left(\frac{\partial}{\partial x} v(x_i)\right)^\top \frac{\partial}{\partial x} v(x_i) \right\|_2 \cdot |\theta^{*\top} v(x_i) - y_i|^2 \right] + O_p \left( \sqrt{\frac{m^2}{n}} \right) \\
&\leq \mathbb{E} \left[ \lambda_{\max} \left( \left(\frac{\partial}{\partial x} v(x_i)\right)^\top \frac{\partial}{\partial x} v(x_i) \right) \cdot ((\mathbb{E}|\xi_i|)^2 + O_p \left( \sqrt{\frac{1}{n}} \right)) \right] + O_p \left( \sqrt{\frac{m^2}{n}} \right)
\end{aligned}$$

By similar argument, we have

$$\begin{aligned}
\mathbb{E} \left[ \frac{1}{\|\hat{\theta}^\top \frac{\partial}{\partial x} v(x_i)\|} \frac{\partial}{\partial x} v(x_i) \left(\frac{\partial}{\partial x} v(x_i)\right)^\top \hat{\theta} \right]^2 &\geq \mathbb{E} \left[ \lambda_{\min} \left( \left(\frac{\partial}{\partial x} v(x_i)\right)^\top \frac{\partial}{\partial x} v(x_i) \right) \cdot ((\mathbb{E}|\epsilon_i|)^2 \right. \\
&\quad \left. + O_p \left( \sqrt{\frac{1}{n}} \right) \right) + O_p \left( \sqrt{\frac{m^2}{n}} \right).
\end{aligned}$$

Recall that  $v(x) = (x_1, \dots, x_m, x_1^2/2, \dots, x_m^2/2, \{x_j x_k\}_{j < k})$ , and the quadratic term in the true model is  $(\beta_2^{*\top} x)^2$  (so then  $\mathbb{E}|\epsilon|$  is easy to compute), then

$$\frac{\partial}{\partial x} v(x) = (I_m, \text{diag}(x_1, \dots, x_m), \text{Perm}(x_i x_j))^\top = \begin{bmatrix} I_m \\ D_x \\ \text{Perm}(x_i x_j) \end{bmatrix} \in \mathbb{R}^{(m^2+m) \times m},$$

where  $D_x = \text{diag}(x_1, \dots, x_d)$ , and  $\text{Perm}(x_i x_j) \in \mathbb{R}^{m \times (m^2 - m)}$  with each column being  $x_j e_k + x_k e_j$  for  $1 \leq j < k \leq m$ .

Then we have

$$\left(\frac{\partial}{\partial x} v(x_i)\right)^\top \frac{\partial}{\partial x} v(x_i) = I_m + D_Q,$$

where  $(D_Q)_{jj} = (x_1^2 + \dots + x_m^2)$ ,  $(D_Q)_{jk} = x_j x_k$ . As a result,  $D_Q = x x^\top + (x_1^2 + \dots + x_m^2) I_m - D_x^2$

$$\inf_{v: \|v\|=1} v^\top (x x^\top + (x_1^2 + \dots + x_d^2) I_d) v = (x_1^2 + \dots + x_d^2) + \inf_v (x^\top v)^2$$

Therefore,

$$1 + (x_1^2 + \dots + x_d^2) - \max x_j^2 \leq \lambda_{\min}(I_d + D_Q) \leq \lambda_{\max}(I_d + D_Q) \leq 1 + 2(x_1^2 + \dots + x_d^2).$$

Moreover,

$$\begin{aligned} H_\theta(X^e, Y^e) &= \frac{1}{n} \sum_{i=1}^n v(x_i) v(x_i)^\top = E[v(x_i) v(x_i)^\top] + O_p\left(\sqrt{\frac{m^2}{n}}\right) \\ &= \text{diag}(\sigma_x^2 I_m, \frac{3}{4} \sigma_x^4 I_m, \sigma_x^4 I_{m(m-1)}) + O_p\left(\sqrt{\frac{m^2}{n}}\right) \end{aligned}$$

Then

$$\begin{aligned} \hat{S}_\epsilon(\mathcal{Q}) &\leq \frac{1}{\max\{\sigma_x^2, \sigma_x^4\}} \mathbb{E}[\lambda_{\max}\left(\frac{\partial}{\partial x} v(x_i)\right)^\top \frac{\partial}{\partial x} v(x_i)] \cdot ((\mathbb{E}|\xi_i|)^2 + O_p\left(\sqrt{\frac{1}{n}}\right)) + O_p\left(\sqrt{\frac{m^2}{n}}\right) \\ &\leq \frac{1}{\max\{\sigma_x^2, \sigma_x^4\}} \mathbb{E}[1 + 2(x_1^2 + \dots + x_m^2)] \cdot ((\mathbb{E}|\xi_i|)^2 + O_p\left(\sqrt{\frac{1}{n}}\right)) + O_p\left(\sqrt{\frac{m^2}{n}}\right) \\ &\leq \frac{1}{\max\{\sigma_x^2, \sigma_x^4\}} (1 + 2m\sigma_x^2) \cdot ((\mathbb{E}|\xi_i|)^2 + O_p\left(\sqrt{\frac{1}{n}}\right)) + O_p\left(\sqrt{\frac{m^2}{n}}\right) \end{aligned}$$

Similarly,

$$\begin{aligned} \hat{S}_\epsilon(\mathcal{Q}) &\geq \frac{1}{\min\{\sigma_x^2, \frac{3}{4}\sigma_x^4\}} \mathbb{E}[\lambda_{\min}\left(\frac{\partial}{\partial x} v(x_i)\right)^\top \frac{\partial}{\partial x} v(x_i)] \cdot ((\mathbb{E}|\xi_i|)^2 + O_p\left(\sqrt{\frac{1}{n}}\right)) + O_p\left(\sqrt{\frac{m^2}{n}}\right) \\ &\geq \frac{1}{\min\{\sigma_x^2, \frac{3}{4}\sigma_x^4\}} \mathbb{E}[1 + (x_1^2 + \dots + x_m^2) - \max x_j^2] \cdot ((\mathbb{E}|\xi_i|)^2 + O_p\left(\sqrt{\frac{1}{n}}\right)) + O_p\left(\sqrt{\frac{m^2}{n}}\right) \\ &\geq \frac{1}{\min\{\sigma_x^2, \frac{3}{4}\sigma_x^4\}} (1 + (m - 2 \log m) \sigma_x^2) \cdot ((\mathbb{E}|\xi_i|)^2 + O_p\left(\sqrt{\frac{1}{n}}\right)) + O_p\left(\sqrt{\frac{m^2}{n}}\right) \end{aligned}$$

Recall that for linear model,

$$\begin{aligned} \hat{S}_\epsilon(\mathcal{L}) &= \Phi^\top H_\theta^{-1}(X^e, Y^e) \Phi = (\mathbb{E}_{x \sim \hat{P}_x} \|x\|_2)^2 (\mathbb{E}|\epsilon_i| + O_p\left(\frac{1}{\sqrt{n}}\right))^2 \frac{\hat{\theta}^\top (\sigma_x^2 I + O_p\left(\sqrt{\frac{m}{n}}\right))^{-1} \hat{\theta}}{\|\hat{\theta}\|^2} \\ &= (\mathbb{E}_{x \sim \hat{P}_x} \|x\|_2)^2 \cdot [(\mathbb{E}|\epsilon_i|)^2 + O_p\left(\frac{1}{\sqrt{n}}\right)] \cdot (\sigma_x^{-2} + O_p\left(\sqrt{\frac{m}{n}}\right)). \end{aligned}$$

Since the true model is  $y = \beta_1^{*\top} x + (\beta_2^{*\top} x)^2 + \xi$  with  $\xi \sim \mathcal{N}(0, \sigma_\xi^2)$ , and  $x \sim \mathcal{N}(0, \sigma_x^2 I_m)$ , we have

$$(\mathbb{E}|\epsilon_i|)^2 = (\mathbb{E}|(\beta_2^{*\top} x)^2 + \xi|)^2 \in [(\|\beta_2^*\|_2^2 \sigma_x^2 - \sqrt{\frac{2}{\pi}} \sigma_\xi)^2, (\|\beta_2^*\|_2^2 \sigma_x^2 + \sqrt{\frac{2}{\pi}} \sigma_\xi)^2].$$

Therefore, when  $\frac{1}{\sigma_x^2} (\|\beta_2^*\|_2^2 \sigma_x^2 - \sqrt{\frac{2}{\pi}} \sigma_\xi)^2 \geq \frac{1}{\max\{\sigma_x^2, \frac{3}{4}\sigma_x^4\}} (1 + 2m\sigma_x^2) \cdot \frac{2}{\pi} \sigma_\xi^2$ , that is,  $(\|\beta_2^*\|_2^2 \sigma_x^2 - \sqrt{\frac{2}{\pi}} \sigma_\xi)^2 \geq \frac{1 + 2m\sigma_x^2}{\max\{\sigma_x^2, 1\}} \cdot \frac{2}{\pi} \sigma_\xi^2$ ,

$$\hat{\Delta}(\mathcal{L}) \geq \hat{\Delta}(\mathcal{Q}) + O_p(\sqrt{\frac{m^2}{n}}).$$

On the other hand,  $\frac{1}{\sigma_x^2} (\|\beta_2^*\|_2^2 \sigma_x^2 + \sqrt{\frac{2}{\pi}} \sigma_\xi)^2 \leq \frac{1}{\min\{\sigma_x^2, \frac{3}{4}\sigma_x^4\}} (1 + m\sigma_x^2 - 2\sigma_x^2 \cdot \log m) \cdot \frac{3}{2\pi} \sigma_\xi^2$ , that is,  $(\|\beta_2^*\|_2^2 \sigma_x^2 + \sqrt{\frac{2}{\pi}} \sigma_\xi)^2 \leq \frac{1}{\min\{1, \frac{3}{4}\sigma_x^2\}} (1 + m\sigma_x^2 - 2\sigma_x^2 \cdot \log m) \cdot \frac{3}{2\pi} \sigma_\xi^2$ ,

$$\hat{\Delta}(\mathcal{L}) \leq \hat{\Delta}(\mathcal{Q}) + O_p(\sqrt{\frac{m^2}{n}}).$$

Then let us consider the case where  $p = \infty, q = 1$  in Eqn (5) of Theorem 4.1,

$$\begin{aligned} \nu_k^i &= \frac{b_k^{q-1}}{(\sum_{k=1}^d b_k^q)^{\frac{1}{p}}} \text{sgn}\left(\frac{\partial}{\partial x_{\cdot, k}} l(\hat{\theta}_{\min}^{\mathcal{M}}, x_i, y_i)\right) = \text{sgn}\left(\frac{\partial}{\partial x_{\cdot, k}} l(\hat{\theta}_{\min}^{\mathcal{M}}, x_i, y_i)\right) \\ &= \text{sgn}\left(\theta^\top \frac{\partial}{\partial x} \mathbf{v}(x_i) e_k\right) \cdot \text{sgn}\left(\theta^\top \mathbf{v}(x_i) - y_i\right). \end{aligned}$$

Then

$$\begin{aligned} \Phi &= \frac{1}{n} \sum_{i=1}^n \nabla_{x, \theta} l(\hat{\theta}_{\min}^{\mathcal{M}}, x_i, y_i) \phi_i \\ &= \frac{1}{n} \sum_{i=1}^n [(\theta^\top \mathbf{v}(x_i) - y_i) \cdot \frac{\partial}{\partial x} v(x_i) + v(x_i) \theta^\top \frac{\partial}{\partial x} v(x_i)] \cdot \text{sgn}(\theta^\top \mathbf{v}(x_i) - y_i) \cdot \text{sgn}\left(\left(\frac{\partial}{\partial x} \mathbf{v}(x_i)\right)^\top \theta\right) \\ &= \frac{1}{n} \sum_{i=1}^n |\theta^\top \mathbf{v}(x_i) - y_i| \cdot \frac{\partial}{\partial x} v(x_i) \text{sgn}\left(\left(\frac{\partial}{\partial x} v(x_i)\right)^\top \theta\right) + \frac{1}{n} \sum_{i=1}^n v(x_i) \cdot \|\theta^\top \frac{\partial}{\partial x} v(x_i)\|_1 \cdot \text{sgn}(\theta^\top \mathbf{v}(x_i) - y_i) \\ &= \mathbb{E}[|\theta^\top \mathbf{v}(x_i) - y_i| \cdot \frac{\partial}{\partial x} v(x_i) \text{sgn}\left(\left(\frac{\partial}{\partial x} v(x_i)\right)^\top \theta\right)] + O_p\left(\frac{m}{\sqrt{n}}\right) \end{aligned}$$

By similar argument, since  $\|\text{sgn}\left(\left(\frac{\partial}{\partial x} v(x_i)\right)^\top \theta\right)\| = \sqrt{d}$  we have

$$\begin{aligned} &\|\mathbb{E}[|\theta^\top \mathbf{v}(x_i) - y_i| \cdot \frac{\partial}{\partial x} v(x_i) \text{sgn}\left(\left(\frac{\partial}{\partial x} v(x_i)\right)^\top \theta\right)]\|^2 / d \\ &\geq \mathbb{E}[\lambda_{\min}\left(\frac{\partial}{\partial x} v(x_i)\right)^\top \frac{\partial}{\partial x} v(x_i)] \cdot ((\mathbb{E}|\epsilon_i|)^2 + O_p(\sqrt{\frac{1}{n}})) + O_p(\sqrt{\frac{m^2}{n}}). \end{aligned}$$

$$\begin{aligned} &\|\mathbb{E}[|\theta^\top \mathbf{v}(x_i) - y_i| \cdot \frac{\partial}{\partial x} \mathbf{v}(x_i) \text{sgn}\left(\left(\frac{\partial}{\partial x} v(x_i)\right)^\top \theta\right)]\|^2 / d \\ &\leq \mathbb{E}[\lambda_{\max}\left(\frac{\partial}{\partial x} v(x_i)\right)^\top \frac{\partial}{\partial x} v(x_i)] \cdot ((\mathbb{E}|\epsilon_i|)^2 + O_p(\sqrt{\frac{1}{n}})) + O_p(\sqrt{\frac{m^2}{n}}). \end{aligned}$$



In addition, for the class of linear models, we have

$$\hat{\Delta}(\mathcal{A}_{lin}) = d \cdot (\mathbb{E}|(\beta_2^\top x)^2 + \epsilon|)^2 \in [(\|\beta_2\|_2^2 \sigma_x^2 - \sqrt{\frac{2}{\pi}} \sigma_\epsilon)^2, (\|\beta_2\|_2^2 \sigma_x^2 + \sqrt{\frac{2}{\pi}} \sigma_\epsilon)^2].$$

Therefore, using the exact same statement as the previous case where  $p = q = 2$ , we get the desired result.

### A.3 Proof of Theorem 5.2 and Corollary 5.1

Now let us first compute the AIF for linear models.

Specifically, let us consider the regression setting  $(x_i, y_i) \in \mathbb{R}^m \times \mathbb{R}$  are *i.i.d.* draws from a joint distribution  $P_{x,y}$ , for  $i = 1, 2, \dots, n$ . Note that we don't assume linear relationship, but the linear regression model tries to find the best linear approximation by solving

$$\hat{\theta} = \arg \min_{\theta} \frac{1}{n} \sum_{i=1}^n l(\theta, x_i, y_i) := \arg \min_{\theta} \frac{1}{2n} \sum_{i=1}^n (y_i - \theta^\top x_i)^2,$$

where we use  $l(\theta, x_i, y_i) = \frac{1}{2}(y_i - \theta^\top x_i)^2$  as the loss function.

Further, let us define

$$\beta_{\min}^{\mathcal{L}} = \arg \min_{\theta} \mathbb{E}_{P_{x,y}} \left[ \frac{1}{2} (Y - \theta^\top X)^2 \right],$$

denoting the best population linear approximation to  $Y$ , which makes  $Cov(x_i, y_i - \theta^{*\top} x_i) = 0$ . Denote  $\eta_i^{\mathcal{L}} = y_i - \beta_{\min}^{\mathcal{L}\top} x_i$ , we then have  $\mathbb{E}[\eta_i^{\mathcal{L}} x_i] = 0$ .

Further, denote  $\eta_i^{\mathcal{L}} = y_i - \beta_{\min}^{\mathcal{L}\top} x_i$ , and

$$\hat{\beta} = \arg \min_{\theta} \frac{1}{2n} \sum_{i=1}^n (y_i - \theta^\top x_i)^2,$$

and we have  $\|\hat{\beta} - \beta_{\min}^{\mathcal{L}}\|_2 = O_p(\sqrt{\frac{m}{n}})$ .

By definition, for  $k \in [m]$ ,

$$b_k = \left| \frac{\partial}{\partial x_{\cdot,k}} l(\hat{\beta}, x_i, y_i, \mathcal{L}) \right| = |y_i - \hat{\beta}^\top x_i| \cdot |\hat{\beta}_k|,$$

and therefore, by letting  $p = q = 2$  in Eqn (5) of Theorem 4.1,

$$\begin{aligned} \psi_k^i &= \frac{b_k^{q-1}}{(\sum_{k=1}^d b_k^q)^{\frac{1}{p}}} \operatorname{sgn} \left( \frac{\partial}{\partial x_{\cdot,k}} l(\hat{\beta}, x_i, y_i, \mathcal{M}) \right) = \frac{b_k}{(\sum_{k=1}^d b_k^2)^{1/2}} \operatorname{sgn}((y_i - \hat{\beta}^\top x_i) \cdot \hat{\beta}_k) \\ &= \frac{(y_i - \hat{\beta}^\top x_i) \cdot \hat{\beta}_k}{|y_i - \hat{\beta}^\top x_i| \cdot \|\hat{\beta}\|_2} = \frac{\hat{\beta}_k}{\|\hat{\beta}\|} \cdot \operatorname{sgn}(y_i - \hat{\beta}^\top x_i). \end{aligned}$$

As a result

$$\phi_i = (\psi_1^i, \psi_2^i, \dots, \psi_m^i)^T = \operatorname{sgn}(y_i - \hat{\beta}^\top x_i) \cdot \frac{1}{\|\hat{\beta}\|} \cdot \hat{\beta},$$

and

$$\begin{aligned}
\frac{\Phi}{\mathbb{E}_{x \sim \hat{P}_x} \|x\|_2} &= \frac{1}{n} \sum_{i=1}^n \nabla_{x, \theta} l(\hat{\beta}, x_i, y_i, \mathcal{M}) \phi_i = \frac{1}{n} \sum_{i=1}^n [(\hat{\beta}^\top x_i - y_i) \cdot I_d + \hat{\beta} x_i^\top] \cdot \text{sgn}(y_i - \hat{\beta}^\top x_i) \cdot \frac{1}{\|\hat{\beta}\|} \cdot \hat{\beta} \\
&= \frac{1}{n \|\hat{\beta}\|} \sum_{i=1}^n [(\hat{\beta}^\top x_i - y_i) \cdot \hat{\beta} + \hat{\beta} x_i^\top \hat{\beta}] \cdot \text{sgn}(y_i - \hat{\beta}^\top x_i) \\
&= -\frac{1}{n \|\hat{\beta}\|} \sum_{i=1}^n (y_i \cdot \hat{\beta}) \cdot \text{sgn}(y_i - \hat{\beta}^\top x_i) \\
&= -\frac{\hat{\beta}}{n \|\hat{\beta}\|} \sum_{i=1}^n y_i \cdot \text{sgn}(y_i - \hat{\beta}^\top x_i) \\
&= -\frac{\hat{\beta}}{n \|\hat{\beta}\|} \sum_{i=1}^n (\eta_i^\mathcal{L} + \beta_{\min}^\mathcal{L} x_i) \cdot \text{sgn}(y_i - \hat{\beta}^\top x_i) \\
&= -\frac{\hat{\beta}}{n \|\hat{\beta}\|} \sum_{i=1}^n \beta_{\min}^\mathcal{L} x_i \cdot \text{sgn}(y_i - \hat{\beta}^\top x_i) - \frac{\hat{\beta}}{n \|\hat{\beta}\|} \sum_{i=1}^n \eta_i^\mathcal{L} \cdot \text{sgn}(y_i - \hat{\beta}^\top x_i) \\
&= -\frac{\hat{\beta}}{n \|\hat{\beta}\|} \sum_{i=1}^n \beta_{\min}^\mathcal{L} x_i \cdot \text{sgn}(\eta_i^\mathcal{L}) - \frac{\hat{\beta}}{n \|\hat{\beta}\|} \sum_{i=1}^n \eta_i^\mathcal{L} \cdot \text{sgn}(\eta_i^\mathcal{L}) \\
&\quad + \frac{\hat{\beta}}{n \|\hat{\beta}\|} \sum_{i=1}^n \beta_{\min}^\mathcal{L} x_i \cdot (\text{sgn}(\eta_i^\mathcal{L}) - \text{sgn}(\eta_i^\mathcal{L} - (\hat{\beta} - \beta_{\min}^\mathcal{L})^\top x_i)) \\
&\quad + \frac{\hat{\beta}}{n \|\hat{\beta}\|} \sum_{i=1}^n \eta_i^\mathcal{L} \cdot (\text{sgn}(\eta_i^\mathcal{L}) - \text{sgn}(\eta_i^\mathcal{L} - (\hat{\beta} - \beta_{\min}^\mathcal{L})^\top x_i)).
\end{aligned}$$

Then we have

$$\mathbb{P}(\text{sgn}(\eta_i^\mathcal{L}) \neq \text{sgn}(\eta_i^\mathcal{L} - (\hat{\beta} - \beta_{\min}^\mathcal{L})^\top x_i)) \leq \mathbb{P}(|\epsilon| \leq |(\hat{\beta} - \beta_{\min}^\mathcal{L})^\top x_i|) = O(\sqrt{\frac{1}{n}}) = o(1).$$

Recall that  $\mathbb{E}[x_i \text{sgn}(\eta_i^\mathcal{L})] = \mathbb{E}[x_i \text{sgn}((x_i^\top \beta_2^*)^2 + \xi_i)] = 0$ , we have

$$\frac{1}{n} \sum_{i=1}^n \beta_{\min}^\mathcal{L} x_i \cdot \text{sgn}(\eta_i^\mathcal{L}) = O_p\left(\frac{1}{\sqrt{n}}\right).$$

Then, we have

$$\frac{\Phi}{\mathbb{E}_{x \sim \hat{P}_x} \|x\|_2} = -\frac{\hat{\beta}}{\|\hat{\beta}\|} \left( \frac{1}{n} \sum_{i=1}^n |\eta_i^\mathcal{L}| + O_p\left(\frac{1}{\sqrt{n}}\right) \right) = -\frac{\hat{\beta}}{\|\hat{\beta}\|} (\mathbb{E}|\eta_i^\mathcal{L}| + O_p\left(\frac{1}{\sqrt{n}}\right))$$

Moreover, the Hessian matrix

$$H_\theta(X^e, Y^e) = 1/n' \sum_{i=1}^{n'} \nabla_{\hat{\theta}}^2 l(\hat{\beta}, x_i^e, y_i^e; \mathcal{A}) = \frac{1}{n} X^{e\top} X^e = \sigma_x^2 I + O_p\left(\sqrt{\frac{m}{n}}\right).$$

Then, we have

$$\begin{aligned}
\hat{S}_\epsilon(\mathcal{L}) &= \Phi^\top H_\theta^{-1}(X^e, Y^e)\Phi = (\mathbb{E}_{x \sim \hat{P}_x} \|x\|_2)^2 (\mathbb{E}|\eta_i^{\mathcal{L}}| + O_p(\frac{1}{\sqrt{n}}))^2 \frac{\hat{\beta}^\top (\sigma_x^2 I + O_p(\sqrt{\frac{m}{n}}))^{-1} \hat{\beta}}{\|\hat{\beta}\|^2} \\
&= \epsilon^2 (\mathbb{E}_{x \sim \hat{P}_x} \|x\|_2)^2 \cdot [(\mathbb{E}|\eta_i^{\mathcal{L}}|)^2 + O_p(\frac{1}{\sqrt{n}})] \cdot (\sigma_x^{-2} + O_p(\sqrt{\frac{m}{n}})) \\
&= \epsilon^2 (\mathbb{E}_{x \sim \hat{P}_x} \|x\|_2)^2 \cdot (\mathbb{E}|\eta_i^{\mathcal{L}}|)^2 \cdot \sigma_x^{-2} + O_p(\sqrt{\frac{m}{n}}). \tag{10}
\end{aligned}$$

Now, let us consider the random effect model in Corollary 5.1, when the true model is  $y = \beta^\top x + \xi$ , where  $x \in \mathbb{R}^M$ ,  $\beta_1, \dots, \beta_M \stackrel{i.i.d.}{\sim} N(0, 1)$ ,  $\xi \sim \mathcal{N}(0, \sigma_\xi^2)$ , and  $x_1, \dots, x_n \stackrel{i.i.d.}{\sim} \mathcal{N}(0, \sigma_x^2 I_M)$ . Then when we only include  $m$  features in the linear predictive model, the residual

$$\eta_i^{\mathcal{L}} = \xi + x_{i,m+1}\beta_{m+1} + \dots + x_{i,M}\beta_M.$$

Then conditional on  $\beta$ , we have

$$\eta_i^{\mathcal{L}} \sim N(0, \sigma_\xi^2 + (\beta_{m+1}^2 + \dots + \beta_M^2)\sigma_x^2).$$

We then have  $\mathbb{E}[|\eta_i^{\mathcal{L}}|]^2 = \frac{2}{\pi}(\sigma_\xi^2 + (\beta_{m+1}^2 + \dots + \beta_M^2)\sigma_x^2)$ . Take expectation w.r.t  $\beta$ , we have  $\mathbb{E}[|\eta_i^{\mathcal{L}}|]^2 = \frac{2}{\pi}(\sigma_\xi^2 + (M - m)\sigma_x^2)$ .

For  $\mathbb{E}_{x \sim \hat{P}_x} \|x\|_2$ , we have

$$\mathbb{E}_{x \sim \hat{P}_x} \|x\|_2 = \mathbb{E}[\sqrt{\beta_1^2 + \dots + \beta_m^2}] = \sqrt{\frac{m+1}{\frac{m}{2}}}.$$

Plug into (10), we get

$$\mathbb{E}[\hat{S}_\epsilon(\mathcal{L})] = \frac{4\epsilon^2}{\pi\sigma_x^2} \frac{\Gamma^2(\frac{m+1}{2})}{\Gamma^2(\frac{m}{2})} \cdot ((M - m)\sigma_x^2 + \sigma_\xi^2) + O_p(\epsilon^2 \sqrt{\frac{m^2}{n}}).$$

#### A.4 Proof of Theorem 5.3

Now let us consider the general basis of the regression setting  $(x_i, y_i) \in \mathbb{R}^m \times \mathbb{R}$  are *i.i.d.* draws from a joint distribution  $P_{x,y}$ , for  $i = 1, 2, \dots, n$ . Suppose we use the basis  $v(x) = (v_1(x), \dots, v_d(x)) = (x_1, \dots, x_m, x_1^2/2, \dots, x_m^2/2, \{x_j x_k\}_{j < k})$ , to approximate  $y$ , and try to solve

$$\hat{\theta} = \arg \min_{\theta \in \mathbb{R}^m} \frac{1}{n} \sum_{i=1}^n l(\theta, x_i, y_i) := \arg \min_{\theta} \frac{1}{2n} \sum_{i=1}^n (y_i - \theta^\top v(x_i))^2.$$

Further, let us define

$$\theta^* = \arg \min_{\theta} \mathbb{E}_{P_{x,y}} [\frac{1}{2}(Y - \theta^\top v(X))^2],$$

denoting the best population linear approximation to  $Y$ .

Denote  $\xi_i = y_i - \theta^{*\top} v(x_i)$ , and let

$$\hat{\theta} = \arg \min_{\theta} \frac{1}{2n} \sum_{i=1}^n (y_i - \theta^\top v(x_i))^2.$$

We have  $\|\hat{\theta} - \theta^*\| = O_p(\sqrt{\frac{m}{n}})$ .

By definition, for  $k \in [m]$ ,

$$b_k = \left| \frac{\partial}{\partial x_{\cdot, k}} l(\hat{\theta}_{\min}^{\mathcal{M}}, x_i, y_i) \right| = |y_i - \hat{\theta}^\top v(x_i)| \cdot \left| \hat{\theta}^\top \frac{\partial}{\partial x_{\cdot, k}} v(x_i) \right| = |y_i - \hat{\theta}^\top v(x_i)| \cdot \left| \hat{\theta}^\top \frac{\partial}{\partial x} v(x_i) e_k \right|.$$

Therefore, by letting  $p = q = 2$  in Eqn (5) of Theorem 4.1,

$$\begin{aligned} \psi_k^i &= \frac{b_k^{q-1}}{(\sum_{k=1}^d b_k^q)^{\frac{1}{p}}} \operatorname{sgn}\left(\frac{\partial}{\partial x_{\cdot, k}} l(\hat{\theta}_{\min}^{\mathcal{M}}, x_i, y_i)\right) = \frac{b_k}{(\sum_{k=1}^d b_k^2)^{1/2}} \operatorname{sgn}\left(\frac{\partial}{\partial x_{\cdot, k}} l(\hat{\theta}_{\min}^{\mathcal{M}}, x_i, y_i)\right) \\ &= \frac{(\hat{\theta}^\top v(x_i) - y_i) \cdot \hat{\theta}^\top \frac{\partial}{\partial x} v(x_i) e_k}{|y_i - \hat{\theta}^\top v(x_i)| \cdot \|\hat{\theta}^\top \frac{\partial}{\partial x} v(x_i)\|_2} = \frac{\hat{\theta}^\top \frac{\partial}{\partial x} v(x_i) e_k}{\|\hat{\theta}^\top \frac{\partial}{\partial x} v(x_i)\|} \cdot \operatorname{sgn}(\hat{\theta}^\top v(x_i) - y_i). \end{aligned}$$

As a result

$$\phi_i^\top = (\psi_1^i, \psi_2^i, \dots, \psi_m^i) = \operatorname{sgn}(\hat{\theta}^\top v(x_i) - y_i) \cdot \frac{1}{\|\hat{\theta}^\top \frac{\partial}{\partial x} v(x_i)\|} \cdot \hat{\theta}^\top \frac{\partial}{\partial x} v(x_i),$$

and

$$\begin{aligned} \nabla_x l(\hat{\theta}, x_i, y_i) &= (\hat{\theta}^\top v(x_i) - y_i) \cdot \left(\frac{\partial}{\partial x} v(x_i)\right)^\top \hat{\theta} \\ \nabla_{x, \theta} l(\hat{\theta}, x_i, y_i) &= v(x_i) \hat{\theta}^\top \frac{\partial}{\partial x} v(x_i) + (\hat{\theta}^\top v(x_i) - y_i) \cdot \frac{\partial}{\partial x} v(x_i) \end{aligned}$$

Then

$$\begin{aligned} \frac{\Phi}{\mathbb{E}_{x \sim \hat{P}_x} \|x\|_2} &= \frac{1}{n} \sum_{i=1}^n \nabla_{x, \theta} l(\hat{\theta}_{\min}^{\mathcal{M}}, x_i, y_i) \phi_i \\ &= \frac{1}{n} \sum_{i=1}^n [(\hat{\theta}^\top v(x_i) - y_i) \cdot \frac{\partial}{\partial x} v(x_i) + v(x_i) \hat{\theta}^\top \frac{\partial}{\partial x} v(x_i)] \cdot \operatorname{sgn}(\hat{\theta}^\top v(x_i) - y_i) \cdot \\ &\quad \frac{1}{\|\hat{\theta}^\top \frac{\partial}{\partial x} v(x_i)\|} \cdot \left(\frac{\partial}{\partial x} v(x_i)\right)^\top \hat{\theta} \\ &= \frac{1}{n \|\hat{\theta}^\top \frac{\partial}{\partial x} v(x_i)\|} \sum_{i=1}^n [(\hat{\theta}^\top v(x_i) - y_i) \cdot \\ &\quad \frac{\partial}{\partial x} v(x_i) \left(\frac{\partial}{\partial x} v(x_i)\right)^\top \hat{\theta} + v(x_i) \cdot \|\hat{\theta}^\top \frac{\partial}{\partial x} v(x_i)\|^2] \cdot \operatorname{sgn}(\hat{\theta}^\top v(x_i) - y_i) \\ &= \frac{1}{n \|\hat{\theta}^\top \frac{\partial}{\partial x} v(x_i)\|} \sum_{i=1}^n |\hat{\theta}^\top v(x_i) - y_i| \cdot \frac{\partial}{\partial x} v(x_i) \left(\frac{\partial}{\partial x} v(x_i)\right)^\top \hat{\theta} \\ &\quad + \frac{1}{n} \sum_{i=1}^n v(x_i) \cdot \|\hat{\theta}^\top \frac{\partial}{\partial x} v(x_i)\| \cdot \operatorname{sgn}(\hat{\theta}^\top v(x_i) - y_i). \end{aligned}$$

Recall that we assume  $\mathbb{E}[\operatorname{sgn}(\epsilon_i) x_i] = 0$ , then we have

$$\frac{\Phi}{\mathbb{E}_{x \sim \hat{P}_x} \|x\|_2} = \mathbb{E}\left[\frac{|\hat{\theta}^\top v(x_i) - y_i|}{\|\hat{\theta}^\top \frac{\partial}{\partial x} v(x_i)\|} \frac{\partial}{\partial x} v(x_i) \left(\frac{\partial}{\partial x} v(x_i)\right)^\top \hat{\theta}\right] + O_p\left(\sqrt{\frac{d}{n}}\right).$$

Then, since

$$\begin{aligned}
& \|\mathbb{E}[\frac{|\hat{\theta}^\top v(x_i) - y_i|}{\|\hat{\theta}^\top \frac{\partial}{\partial x} v(x_i)\|} \frac{\partial}{\partial x} v(x_i) (\frac{\partial}{\partial x} v(x_i))^\top \hat{\theta}]\|^2 \\
& \leq \mathbb{E}[\|\frac{|\hat{\theta}^\top v(x_i) - y_i|}{\|\hat{\theta}^\top \frac{\partial}{\partial x} v(x_i)\|} \frac{\partial}{\partial x} v(x_i) (\frac{\partial}{\partial x} v(x_i))^\top \hat{\theta}\|^2] \\
& \leq \mathbb{E}[\|(\frac{\partial}{\partial x} v(x_i))^\top \frac{\partial}{\partial x} v(x_i)\|_2 \cdot |\hat{\theta}^\top v(x_i) - y_i|^2] \\
& \leq \mathbb{E}[\|(\frac{\partial}{\partial x} v(x_i))^\top \frac{\partial}{\partial x} v(x_i)\|_2 \cdot |\theta^{*\top} v(x_i) - y_i|^2] + O_p(\sqrt{\frac{d}{n}}) \\
& \leq \mathbb{E}[\lambda_{\max}(\frac{\partial}{\partial x} v(x_i))^\top \frac{\partial}{\partial x} v(x_i)] \cdot ((\mathbb{E}|\xi_i|)^2 + O_p(\sqrt{\frac{1}{n}})) + O_p(\sqrt{\frac{d}{n}})
\end{aligned}$$

Moreover,

$$H_\theta(X^e, Y^e) = \frac{1}{n} \sum_{i=1}^n v(x_i) v(x_i)^\top = E[v(x_i) v(x_i)^\top] + O_p(\sqrt{\frac{d}{n}})$$

Then

$$\hat{S}_\epsilon(\mathcal{G}\mathcal{L}) \leq \frac{1}{\lambda_{\min}(E[v(x_i) v(x_i)^\top])} \mathbb{E}[\lambda_{\max}(\frac{\partial}{\partial x} v(x_i))^\top \frac{\partial}{\partial x} v(x_i)] \cdot ((\mathbb{E}|\xi_i|)^2 + O_p(\sqrt{\frac{1}{n}})) + O_p(\sqrt{\frac{m^2}{n}}).$$

## A.5 Proof of Theorem 5.4

Now let us first recall the AIF for linear models.

Specifically, let us consider the regression setting  $(x_i, y_i) \in \mathbb{R}^d \times \mathbb{R}$  are *i.i.d.* draws from a joint distribution  $P_{x,y}$ , for  $i = 1, 2, \dots, n$ . Note that we don't assume linear relationship, but the linear regression model tries to find the best linear approximation by solving

$$\hat{\theta} = \arg \min_{\theta} \frac{1}{n} \sum_{i=1}^n l(\theta, \tilde{x}_i, y_i) := \arg \min_{\theta} \frac{1}{2n} \sum_{i=1}^n (y_i - \theta^\top \tilde{x}_i)^2,$$

where  $\tilde{x}_i = x_i + \vartheta_i$  we use  $l(\theta, \tilde{x}_i, y_i) = \frac{1}{2}(y_i - \theta^\top \tilde{x}_i)^2$  as the loss function.

Further, let us define

$$\beta^* = \arg \min_{\theta} \mathbb{E}_{P_{x,y}}[\frac{1}{2}(y - \theta^\top x)^2] = (\mathbb{E}[xx^\top])^{-1} \mathbb{E}[xy] = (\sigma_x^2)^{-1} \mathbb{E}[xy],$$

$$\beta_{\min}^{\mathcal{L}} = \arg \min_{\theta} \mathbb{E}_{P_{x,y}}[\frac{1}{2}(y - \theta^\top \tilde{x})^2] = (\mathbb{E}[\tilde{x}\tilde{x}^\top])^{-1} \mathbb{E}[\tilde{x}y] = (\sigma_x^2 + \sigma_r^2)^{-1} \mathbb{E}[xy] = \frac{\sigma_x^2}{\sigma_x^2 + \sigma_r^2} \beta^*,$$

denoting the best population linear approximation to  $Y$ , which makes  $Cov(x_i, y_i - \theta^{*\top} x_i) = 0$ . Denote  $\eta_i^{\mathcal{L}} = y_i - \beta_{\min}^{\mathcal{L}\top} x_i$ , we then have  $\mathbb{E}[\eta_i^{\mathcal{L}} x_i] = 0$ .

Suppose  $y_i = \beta^* x_i + \xi_i$ , then  $y_i - \beta_{\min}^{\mathcal{L}\top} x_i = y_i - \beta_{\min}^{\mathcal{L}\top} x_i - \beta_{\min}^{\mathcal{L}\top} \vartheta_i = (\beta^* - \beta_{\min}^{\mathcal{L}})^\top x_i + \xi_i - \beta_{\min}^{\mathcal{L}\top} \vartheta_i$

$$\mathbb{E}[(y_i - \beta_{\min}^{\mathcal{L}\top} \tilde{x}_i) \tilde{x}_i] = 0$$

$$\begin{aligned}
\text{Var}(y_i - \beta_{\min}^{\mathcal{L}\top} \tilde{x}_i) &= \text{Var}(y_i - \frac{\sigma_x^2}{\sigma_x^2 + \sigma_r^2} \beta^{*\top} \tilde{x}_i) \\
&= \text{Var}(y_i - \frac{\sigma_x^2}{\sigma_x^2 + \sigma_r^2} \beta^{*\top} x_i) + \text{Var}(\frac{\sigma_x^2}{\sigma_x^2 + \sigma_r^2} \beta^{*\top} \vartheta_i) \\
&= \text{Var}(\beta^{*\top} x_i + \xi_i - \frac{\sigma_x^2}{\sigma_x^2 + \sigma_r^2} \beta^{*\top} x_i) + \text{Var}(\frac{\sigma_x^2}{\sigma_x^2 + \sigma_r^2} \beta^{*\top} \vartheta_i) \\
&= \text{Var}(\frac{\sigma_r^2}{\sigma_x^2 + \sigma_r^2} \beta^{*\top} x_i) + \text{Var}(\xi_i) + \text{Var}(\frac{\sigma_x^2}{\sigma_x^2 + \sigma_r^2} \beta^{*\top} \vartheta_i) \\
&= (\frac{\sigma_r^2 \sigma_x^2}{\sigma_x^2 + \sigma_r^2}) \|\beta^*\|_2^2 + \sigma_\xi^2 + (\frac{\sigma_r^2 \sigma_x^2}{\sigma_x^2 + \sigma_r^2}) \|\beta^*\|_2^2 \\
&= (\frac{2\sigma_r^2 \sigma_x^2}{\sigma_x^2 + \sigma_r^2}) \|\beta^*\|_2^2 + \sigma_\xi^2
\end{aligned}$$

Further, denote  $\eta_i^{\mathcal{L}} = y_i - \beta_{\min}^{\mathcal{L}\top} x_i$ , and

$$\hat{\beta} = \arg \min_{\theta} \frac{1}{2n} \sum_{i=1}^n (y_i - \theta^T x_i)^2,$$

and we have  $\|\hat{\beta} - \beta_{\min}^{\mathcal{L}}\|_2 = O_p(\sqrt{\frac{m}{n}})$ . Then, we have

$$\frac{\Phi}{\mathbb{E}_{x \sim \hat{P}_x} \|x\|_2} = -\frac{\hat{\beta}}{\|\hat{\beta}\|} \left( \frac{1}{n} \sum_{i=1}^n |\eta_i^{\mathcal{L}}| + O_p\left(\frac{1}{\sqrt{n}}\right) \right) = -\frac{\hat{\beta}}{\|\hat{\beta}\|} (\mathbb{E}|\eta_i^{\mathcal{L}}| + O_p\left(\frac{1}{\sqrt{n}}\right))$$

Moreover, the Hessian matrix on the test data

$$H_{\theta}(X^e, Y^e) = 1/n' \sum_{i=1}^{n'} \nabla_{\theta}^2 l(\hat{\beta}, x_i^e, y_i^e; \mathcal{A}) = \frac{1}{n} X^{e\top} X^e = \sigma_x^2 I + O_p\left(\sqrt{\frac{m}{n}}\right).$$

Then we have

$$\begin{aligned}
\hat{S}_{\epsilon}(\mathcal{L}) &= \Phi^{\top} H_{\theta}^{-1}(X^e, Y^e) \Phi = (\mathbb{E}_{x \sim \hat{P}_x} \|x\|_2)^2 (\mathbb{E}|\eta_i^{\mathcal{L}}| + O_p\left(\frac{1}{\sqrt{n}}\right))^2 \frac{\hat{\beta}^{\top} (\sigma_x^2 I + O_p\left(\sqrt{\frac{m}{n}}\right))^{-1} \hat{\beta}}{\|\hat{\beta}\|_2^2} \\
&= (\mathbb{E}_{x \sim \hat{P}_x} \|x\|_2)^2 \cdot \epsilon^2 \cdot [(\mathbb{E}|\eta_i^{\mathcal{L}}|)^2 + O_p\left(\frac{1}{\sqrt{n}}\right)] \cdot (\sigma_x^{-2} + O_p\left(\sqrt{\frac{m}{n}}\right)).
\end{aligned}$$

and

$$\begin{aligned}
\hat{S}_{\epsilon}(\mathcal{L}_{noise}) &= \Phi^{\top} H_{\theta}^{-1}(X^e, Y^e) \Phi = (\mathbb{E}_{x \sim \hat{P}_x} \|x\|_2)^2 (\mathbb{E}|\eta_i^{\mathcal{L}_{noise}}| + O_p\left(\frac{1}{\sqrt{n}}\right))^2 \frac{\hat{\beta}^{\top} ((\sigma_x^2 + \sigma_r^2)I + O_p\left(\sqrt{\frac{m}{n}}\right))^{-1} \hat{\beta}}{\|\hat{\beta}\|_2^2} \\
&= (\mathbb{E}_{x \sim \hat{P}_x} \|x\|_2)^2 \cdot \epsilon^2 \cdot [(\mathbb{E}|\eta_i^{\mathcal{L}_{noise}}|)^2 + O_p\left(\frac{1}{\sqrt{n}}\right)] \cdot ((\sigma_x^2 + \sigma_r^2)^{-1} + O_p\left(\sqrt{\frac{m}{n}}\right)).
\end{aligned}$$

Then

$$\begin{aligned}
\frac{\hat{S}_{\epsilon}(\mathcal{L}_{noise})}{\hat{S}_{\epsilon}(\mathcal{L})} &= \frac{\sigma_x^2}{\sigma_x^2 + \sigma_r^2} \cdot \frac{(\frac{2\sigma_r^2 \sigma_x^2}{\sigma_x^2 + \sigma_r^2}) \|\beta_{\min}^{\mathcal{L}}\|_2^2 + \sigma_\xi^2}{\sigma_\xi^2} + O\left(\sqrt{\frac{m}{n}}\right) \\
&= \frac{\sigma_x^2 / \sigma_\xi^2}{\sigma_x^2 + \sigma_r^2} \cdot \left( (\frac{2\sigma_r^2 \sigma_x^2}{\sigma_x^2 + \sigma_r^2}) \|\beta_{\min}^{\mathcal{L}}\|_2^2 + \sigma_\xi^2 \right) + O\left(\sqrt{\frac{m}{n}}\right)
\end{aligned}$$

## A.6 Proof of Corollary 6.1

We consider kernel regression in the following form:

$$\hat{\mathcal{L}}_n(\theta, X, Y) = \frac{1}{n} \sum_{i=1}^n \left( y_i - \sum_{j=1}^n K(x_i, x_j) \theta_j \right)^2 + \lambda \|\theta\|_2^2.$$

Let us denote  $K(x_i) := (K(x_i, x_1), K(x_i, x_2), \dots, K(x_i, x_n))^T$ . The proof of Corollary 6.1 is almost the same as Theorem 4.1, with slightly modification. Actually, the loss can be in a general form as  $\hat{\mathcal{L}}_n(\theta, X, Y)$ , our proof for Theorem 4.1 can still be applied. Since

$$\nabla_{\theta} \hat{\mathcal{L}}_n(\theta, X, Y) = \frac{1}{n} \sum_{i=1}^n 2 \left( K(x_i)^T \theta - y_i \right) K(x_i) + 2\lambda \theta,$$

we have

$$\begin{aligned} \nabla_{x_k, \theta} \hat{\mathcal{L}}_n(\theta, X, Y) &= \frac{2}{n} \sum_{i=1}^n \nabla_{x_k} \left( K(x_i)^T \theta - y_i \right) K(x_i) \\ &= \frac{2}{n} \sum_{i=1}^n \left( K(x_i)^T \theta \mathcal{K}_{x_i, x_k} + K(x_i) \theta^T \mathcal{K}_{x_i, x_k} - y_i \mathcal{K}_{x_i, x_k} \right), \end{aligned}$$

where  $\mathcal{K}_{x_i, x_k}$  is a  $n \times m$  matrix in the following form:

$$\mathcal{K}_{x_i, x_k} = \begin{pmatrix} \left( \frac{\partial K(x_i, x_1)}{\partial x_k} \right)^T \\ \vdots \\ \left( \frac{\partial K(x_i, x_n)}{\partial x_k} \right)^T \end{pmatrix}.$$

Meanwhile,

$$\nabla_{\theta\theta}^2 \hat{\mathcal{L}}_n(\theta, X, Y) = \frac{2}{n} \sum_{i=1}^n K(x_i) K(x_i)^T + 2\lambda I.$$

Thus, we have

$$\begin{aligned} \hat{\theta}_{\varepsilon, \min} - \hat{\theta}_{\min} + O(\|\hat{\theta}_{\varepsilon, \min} - \hat{\theta}_{\min}\|_2^2) &= \left( -\nabla_{\theta\theta}^2 \hat{\mathcal{L}}_n(\hat{\theta}_{\min}, X, Y) \right)^{-1} \left( \sum_{i=1}^n \nabla_{x_i, \theta} \hat{\mathcal{L}}_n(\hat{\theta}_{\min}, X, Y) \delta_i \right. \\ &\quad \left. + \|\hat{\theta}_{\varepsilon, \min} - \hat{\theta}_{\min}\|_2 \|\delta_i\|_2 \right). \end{aligned}$$

Besides,

$$\nabla_{x_k} \hat{\mathcal{L}}_n(\theta, X, Y) = \frac{2}{n} \sum_{i=1}^n \left( K(x_i)^T \theta - y_i \right) \mathcal{K}_{x_i, x_k}^T \theta,$$

By the argument in Theorem 4.1, we know

$$\lim_{\varepsilon \rightarrow 0} \frac{\delta_i}{\varepsilon} = \beta_i$$

where

$$\beta_{i,k} = \frac{c_k^{q-1}}{\left( \sum_{k=1}^m c_k^q \right)^{\frac{1}{p}}} \operatorname{sgn} \left( \nabla_{x_i} \hat{\mathcal{L}}_n(\hat{\theta}_{\min}, k) \right),$$

with  $c_k = |\nabla_{x_i} \hat{\mathcal{L}}_n(\hat{\theta}_{\min}, k)|$  and  $\nabla_{x_i} \hat{\mathcal{L}}_n(\hat{\theta}_{\min}, k)$  is short for the  $k$ -th coordinate of  $\nabla_{x_i} \hat{\mathcal{L}}_n(\theta, X, Y)$ .

## A.7 Proof of Theorem 6.1

In this subsection, we state more rigorously about our theorem. Firstly, we notice that if we let  $n$  and  $\varepsilon$  in Lemma 6.1 to be independent with each other, actually, the definition of  $\hat{\mathcal{I}}^{DRO}(\mathcal{M})$  should be defined as

$$\frac{d\hat{\theta}_{\varepsilon, \min}^{\mathcal{M}, DRO}}{d\varepsilon} \Big|_{\varepsilon=0}$$

and will obtain a limit that is dependent of sample size  $n$  and as  $n$  goes to infinity,  $\hat{\mathcal{I}}^{DRO}(\mathcal{M})$  will go to a trivial solution 0. In order to obtain a limit independent of sample size, we need  $n$  and  $\varepsilon$  to be dependent. Besides, if we do let  $n$  and  $\varepsilon$  to be dependent, the limit of  $\hat{\mathcal{I}}^{DRO}(\mathcal{M})$  depends on the dependent relationship between  $\varepsilon$  and  $n$ . So unlike AIF,  $\hat{\mathcal{I}}^{DRO}(\mathcal{M})$  is algorithm dependent.

We assume  $n$  is a function of  $\varepsilon$  and  $n\varepsilon^u = 1$ . Then, we still have

$$\hat{\theta}_{\varepsilon, \min}^{\mathcal{M}, DRO} - \hat{\theta}_{\min}^{\mathcal{M}} \approx \left( -\frac{1}{n} \sum_{i=1}^n \nabla_{\theta}^2 L(\hat{\theta}_{\min}^{\mathcal{M}}, x_i, y_i) \right)^{-1} \left( \frac{1}{n} \sum_{i=1}^n \nabla_{x, \theta} L(\hat{\theta}_{\min}^{\mathcal{M}}, x_i, y_i) \delta_i \right).$$

Notice, we can put all the mass in 6.1 on one of  $\delta_i$ , so, we can put all on the  $\delta_i$  with largest  $\|\nabla_x L(\hat{\theta}_{\min}^{\mathcal{M}}, x_i, y_i)\|_q$  in order to achieve the maximum, which yields the final result.



## References

- [1] Naman Agarwal, Alon Gonen, and Elad Hazan. Learning in non-convex games with an optimization oracle. *arXiv preprint arXiv:1810.07362*, 2018.
- [2] Anish Athalye, Nicholas Carlini, and David Wagner. Obfuscated gradients give a false sense of security: Circumventing defenses to adversarial examples. *arXiv preprint arXiv:1802.00420*, 2018.
- [3] Erhan Bayaktar and Lifeng Lai. On the adversarial robustness of robust estimators. *arXiv preprint arXiv:1806.03801*, 2018.
- [4] Aharon Ben-Tal, Laurent El Ghaoui, and Arkadi Nemirovski. *Robust optimization*, volume 28. Princeton University Press, 2009.
- [5] Hans-Georg Beyer and Bernhard Sendhoff. Robust optimization—a comprehensive survey. *Computer methods in applied mechanics and engineering*, 196(33-34):3190–3218, 2007.
- [6] Andreas Christmann and Ingo Steinwart. On robustness properties of convex risk minimization methods for pattern recognition. *Journal of Machine Learning Research*, 5(Aug):1007–1034, 2004.
- [7] Jeremy M Cohen, Elan Rosenfeld, and J Zico Kolter. Certified adversarial robustness via randomized smoothing. *arXiv preprint arXiv:1902.02918*, 2019.
- [8] Christophe Croux and Gentiane Haesbroeck. Influence function and efficiency of the minimum covariance determinant scatter matrix estimator. *Journal of Multivariate Analysis*, 71(2):161–190, 1999.
- [9] Michiel Debruyne, Mia Hubert, and Johan AK Suykens. Model selection in kernel based regression using the influence function. *Journal of Machine Learning Research*, 9(Oct):2377–2400, 2008.
- [10] Simon S Du, Xiyu Zhai, Barnabas Póczos, and Aarti Singh. Gradient descent provably optimizes over-parameterized neural networks. *arXiv preprint arXiv:1810.02054*, 2018.
- [11] Alhussein Fawzi, Omar Fawzi, and Pascal Frossard. Analysis of classifiers robustness to adversarial perturbations. *Machine Learning*, 107(3):481–508, 2018.
- [12] Rui Gao and Anton J Kleywegt. Distributionally robust stochastic optimization with wasserstein distance. *arXiv preprint arXiv:1604.02199*, 2016.
- [13] Ian J Goodfellow, Jonathon Shlens, and Christian Szegedy. Explaining and harnessing adversarial examples. *arXiv preprint arXiv:1412.6572*, 2014.
- [14] Kaiming He, Xiangyu Zhang, Shaoqing Ren, and Jian Sun. Deep residual learning for image recognition. In *Proceedings of the IEEE conference on computer vision and pattern recognition*, pages 770–778, 2016.
- [15] Arthur Jacot, Franck Gabriel, and Clément Hongler. Neural tangent kernel: Convergence and generalization in neural networks. In *Advances in neural information processing systems*, pages 8571–8580, 2018.
- [16] Pang Wei Koh and Percy Liang. Understanding black-box predictions via influence functions. In *Proceedings of the 34th International Conference on Machine Learning-Volume 70*, pages 1885–1894. JMLR. org, 2017.

- [17] Alexey Kurakin, Ian J. Goodfellow, and Samy Bengio. Adversarial machine learning at scale. 2017.
- [18] José Lezama, Qiang Qiu, Pablo Musé, and Guillermo Sapiro. Ole: Orthogonal low-rank embedding-a plug and play geometric loss for deep learning. In *Proceedings of the IEEE Conference on Computer Vision and Pattern Recognition*, pages 8109–8118, 2018.
- [19] Xuanqing Liu and Cho-Jui Hsieh. Rob-gan: Generator, discriminator, and adversarial attacker. In *Proceedings of the IEEE Conference on Computer Vision and Pattern Recognition*, pages 11234–11243, 2019.
- [20] Yong Liu, Shali Jiang, and Shizhong Liao. Efficient approximation of cross-validation for kernel methods using bouligand influence function. In *International Conference on Machine Learning*, pages 324–332, 2014.
- [21] Aleksander Madry, Aleksandar Makelov, Ludwig Schmidt, Dimitris Tsipras, and Adrian Vladu. Towards deep learning models resistant to adversarial attacks. *arXiv preprint arXiv:1706.06083*, 2017.
- [22] Michel Minoux. Robust network optimization under polyhedral demand uncertainty is np-hard. *Discrete Applied Mathematics*, 158(5):597–603, 2010.
- [23] Gyung-Jin Park, Tae-Hee Lee, Kwon Hee Lee, and Kwang-Hyeon Hwang. Robust design: an overview. *AIAA journal*, 44(1):181–191, 2006.
- [24] Amartya Sanyal, Varun Kanade, and Philip HS Torr. Learning low-rank representations. *arXiv preprint arXiv:1804.07090*, 2018.
- [25] Ali Shafahi, Mahyar Najibi, Mohammad Amin Ghiasi, Zheng Xu, John Dickerson, Christoph Studer, Larry S Davis, Gavin Taylor, and Tom Goldstein. Adversarial training for free! In *Advances in Neural Information Processing Systems*, pages 3353–3364, 2019.
- [26] Matthew Staib and Stefanie Jegelka. Distributionally robust deep learning as a generalization of adversarial training. In *NIPS workshop on Machine Learning and Computer Security*, 2017.
- [27] Christian Szegedy, Wojciech Zaremba, Ilya Sutskever, Joan Bruna, Dumitru Erhan, Ian Goodfellow, and Rob Fergus. Intriguing properties of neural networks. *arXiv preprint arXiv:1312.6199*, 2013.
- [28] Genichi Taguchi and Madhav S Phadke. Quality engineering through design optimization. In *Quality Control, Robust Design, and the Taguchi Method*, pages 77–96. Springer, 1989.
- [29] Dong Yin, Kannan Ramchandran, and Peter Bartlett. Rademacher complexity for adversarially robust generalization. *arXiv preprint arXiv:1810.11914*, 2018.
